# Supplementary material for: Incorporation of square-planar Pd2+in fluorite CeO2: hydrothermal preparation, local structure, redox properties and stability
Source: Royal Society of Chemistry journal article supplement (doi:10.1039/c5ta02007g), 2015-01-01
Supplement: c5ta02007g1.pdf [file c5ta02007g1.pdf]

## Supporting Information

### Incorporation of Square-Planar Pd<sup>2+</sup> in Fluorite CeO<sub>2</sub>: Hydrothermal Preparation, Local Structure, Redox Properties and Stability

Craig I. Hiley, Janet M. Fisher, David Thompsett, Reza J. Kashtiban, Jeremy Sloan, Richard I. Walton

#### Lattice Parameter

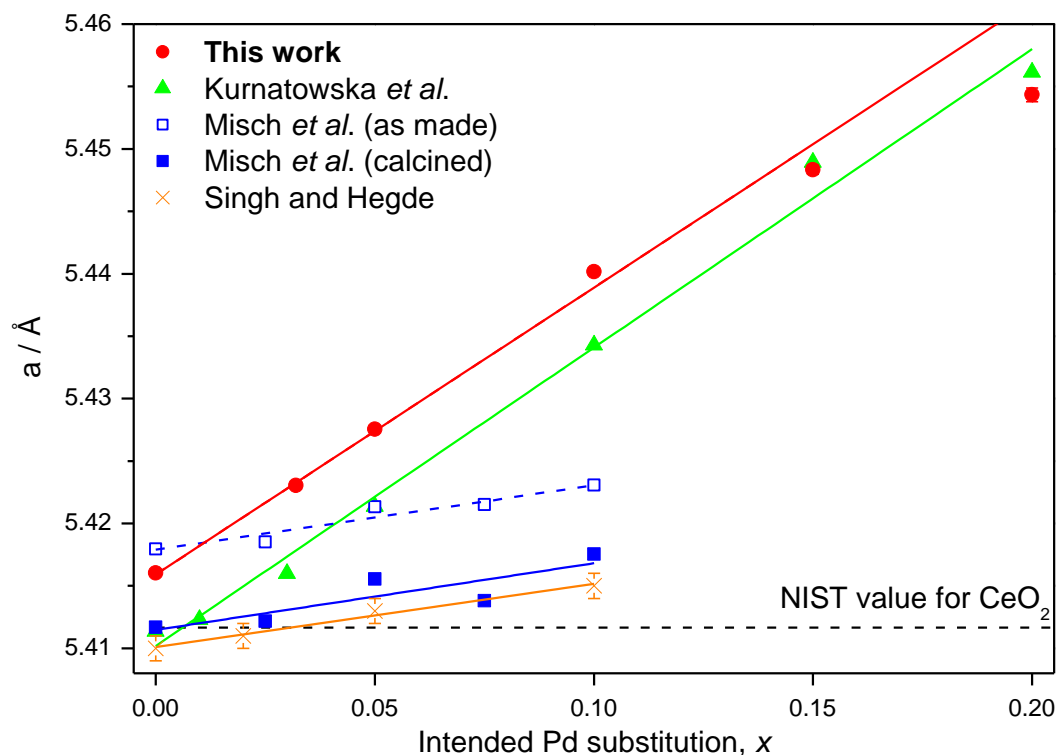

Figure S1. Refined lattice parameter,  $a$ , as a function of  $x$  in  $Ce_{1-x}Pd_xO_{2-\delta}$ . Linear fit to  $0 \leq x \leq 0.15$  has been extrapolated up to  $x = 0.20$  with lattice parameters for  $Ce_{1-x}Pd_xO_{2-\delta}$  reported by Kurnatowska et al.,<sup>1</sup> Misch et al.,<sup>2</sup> and Singh and Hedge<sup>3</sup> included for comparison. When not shown, error bars are smaller than data points.

#### Rietveld Refinement

Values for the Ce and O  $U_{iso}$  ( $0.00766(5) \text{ \AA}^2$  and  $0.0174(5) \text{ \AA}^2$ , respectively) were taken from a refinement of highly crystalline CeO<sub>2</sub> (NIST) where the site occupancies were fixed at 1. Although the Pd and Ce were refined on separate sites, the Pd  $U_{iso}$  was taken to be the same as that of Ce. Pd coordinates were fixed on the square planar 24e site, and the Pd and Ce occupancies were fixed to give the correct Pd:Ce ratio.

Table S1: Structural parameters determined by Rietveld refinement for Pd-CeO<sub>2</sub> materials

| $x$    | 24e site Pd occupancy | Refined O occupancy | $R_{wp}$ | $R_p$  | $\chi^2$ |
|--------|-----------------------|---------------------|----------|--------|----------|
| 0      | 0                     | 1.009(5)            | 4.54%*   | 3.50%* | 1.036*   |
| 0.05   | 0.0083                | 0.988(5)            | 3.59%    | 2.78%  | 1.152    |
| 0.10   | 0.0167                | 0.943(5)            | 3.72%    | 2.88%  | 1.218    |
| 0.15   | 0.025                 | 0.925(6)            | 4.20%    | 3.29%  | 1.491    |
| 0.20** | 0.0333                | 0.855(6)            | 5.51%    | 4.40%  | 1.680    |

\* Different scan parameters to other powder patterns. \*\*not phase pure.

The O occupancy shows a decrease with increasing  $x$ , in line with the chemical formula Ce<sub>1-x</sub>Pd<sub>x</sub>O<sub>2-x</sub>

### General Characterisation

Table S2. ICP-OES measured metal content by mass of Ce<sub>1-x</sub>Pd<sub>x</sub>O<sub>2- $\delta$</sub>  with calculated formula, assuming remaining mass is oxide.

| Intended $x$ | Ce / %  | Pd / %   | Na / %   | Calculated Formula                                                                     |
|--------------|---------|----------|----------|----------------------------------------------------------------------------------------|
| <b>0.05</b>  | 72.5(3) | 2.85(30) | 0.18(30) | Ce <sub>0.94(3)</sub> Pd <sub>0.049(6)</sub> Na <sub>0.01(2)</sub> O <sub>2.8(1)</sub> |
| <b>0.20</b>  | 65.4(3) | 12.6(3)  | 0.09(30) | Ce <sub>0.79(3)</sub> Pd <sub>0.200(8)</sub> Na <sub>0.01(2)</sub> O <sub>2.3(1)</sub> |

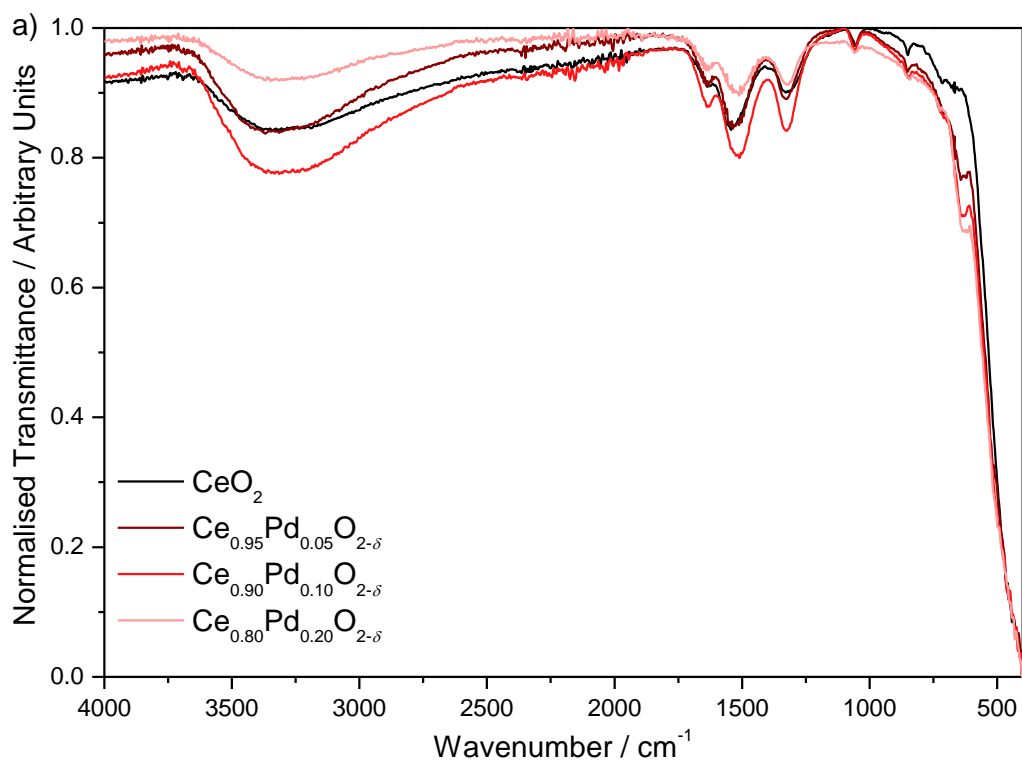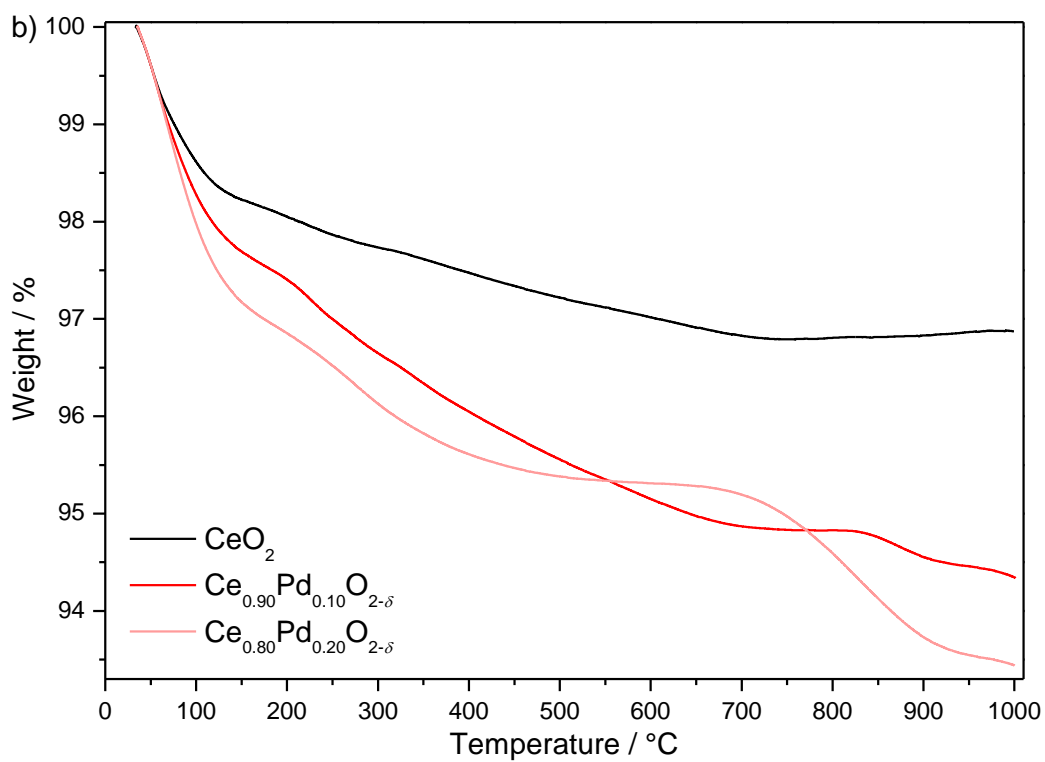

Figure S2 a) FTIR spectra and b) TGA of  $\text{Ce}_{1-x}\text{Pd}_x\text{O}_{2-\delta}$  ( $0 \leq x \leq 0.20$ ) prepared hydrothermally.

Table S3. Measured values of  $x$  from EDX elemental analysis (from high resolution TEM) of four different areas of  $Ce_{0.90}Pd_{0.10}O_{2-\delta}$  and  $Ce_{0.80}Pd_{0.20}O_{2-\delta}$ .

| Intended $x$ | Area 1 $x$ | Area 2 $x$ | Area 3 $x$ | Area 4 $x$ | Average $x$ | Standard Deviation |
|--------------|------------|------------|------------|------------|-------------|--------------------|
| 0.10         | 0.116      | 0.121      | 0.107      | 0.097      | 0.110       | 0.011              |
| 0.20         | 0.190      | 0.166      | 0.183      | 0.185      | 0.181       | 0.011              |

## X-ray Absorption Spectroscopy

### Ce $L_{III}$ -Edge XANES

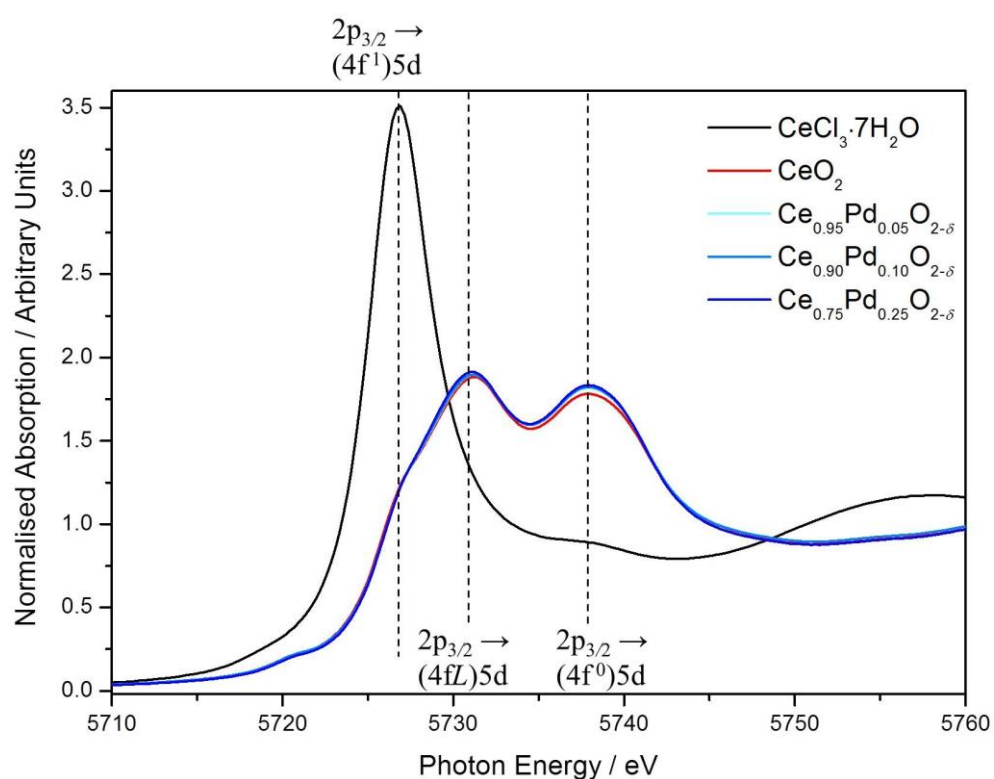

Figure S3. Ce  $L_{III}$ -edge XANES spectra of  $Ce_{1-x}Pd_xO_{2-\delta}$  ( $x = 0.05, 0.10, 0.25$ ) compared to  $Ce^{3+}$  ( $CeCl_3 \cdot 7H_2O$ , Sigma-Aldrich) and  $Ce^{4+}$  ( $CeO_2$ , Sigma-Aldrich) references.

The labelling of the spectral features is according to the literature (see Takhashi et al.,<sup>4</sup> and references therein), which highlights the fact that the Ce in the Pd-containing samples is virtually unchanged from the highly crystalline  $CeO_2$  reference material.

## Pd K-edge XANES

Pd K-edge XANES spectra of  $\text{Ce}_{1-x}\text{Pd}_x\text{O}_{2-\delta}$  show a slight shift ( $\sim 1.2$  eV) in edge position compared to that of PdO. This could be attributed to differences in local structure and not an increased oxidation state since previous Pd K-edge XANES experiments<sup>5</sup> show that Pd in the +4 oxidation state is expected to have a larger edge shift of approximately 3.2 eV. Indeed, Kim *et al.* found that the K-edge of Pd was very sensitive to local environment as well as oxidation state.<sup>5</sup> However, the change in intensity of the white line, suggesting an increase of the unoccupied state density, would also be consistent with charge being extracted from  $\text{Pd}^{2+}$  ions to give a net charge slightly higher than 2+. The oxygen vacancies needed to compensate lattice Ce-substitution by Pd, could be stabilised around Pd ions removing charge from the cations, which is consistent with the EXAFS analysis where an average coordination number of 7 instead of 8 for the second Pd-O shell is obtained.

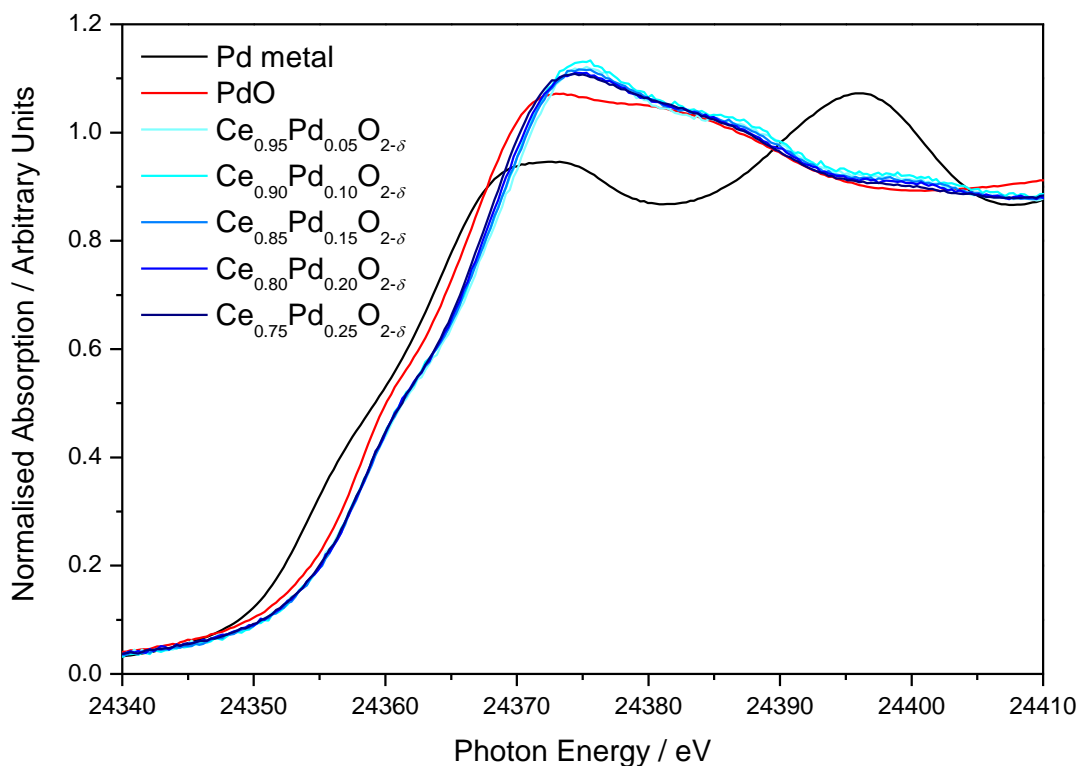

Figure S4. Pd K-edge XANES spectra of  $\text{Ce}_{1-x}\text{Pd}_x\text{O}_{2-\delta}$  ( $x = 0.05, 0.10, 0.15, 0.20, 0.25$ ) compared to Pd metal foil (B18 reference) and  $\text{Pd}^{2+}$  (PdO, Sigma-Aldrich) references.

## Temperature Programmed Reduction

Table S4. Analysis of TPR results shown in Figure 6. The %  $Ce^{4+}$  reduced is calculated assuming all  $Pd^{2+}$  is reduced to  $Pd^0$ .

| Intended $x$ | $T_{max} / ^\circ C$ | H oxidised / mmol $g^{-1}$ | $Ce^{4+}$ reduced / % |
|--------------|----------------------|----------------------------|-----------------------|
| 0.05         | 140                  | 1.36                       | 13.8                  |
| 0.10         | 120                  | 2.23                       | 19.2                  |
| 0.15         | 96                   | 3.13                       | 25.3                  |
| 0.20         | 73                   | 4.08                       | 32.7                  |
| 0.25         | 65                   | 4.37                       | 26.3                  |

## TEM EELS elemental mapping

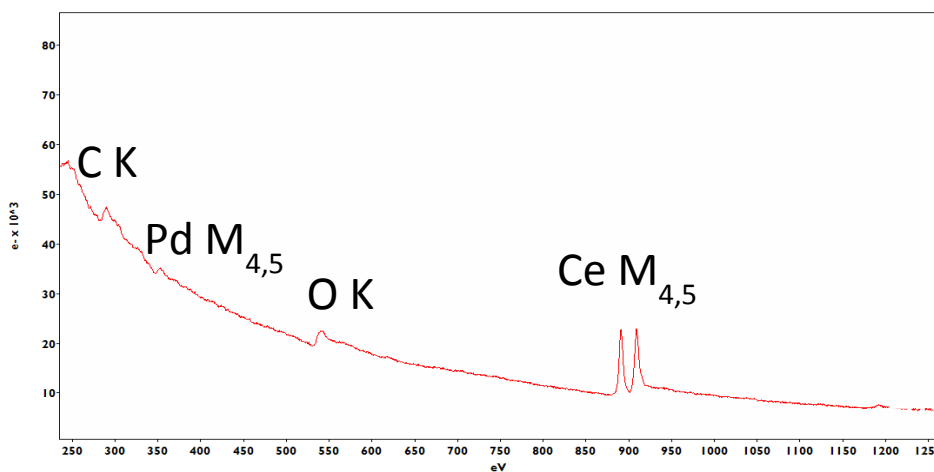

Figure S5: Typical EELS data recorded from Pd-CeO<sub>2</sub> using TEM

## References

- [1] M. Kurnatowska, L. Kepinski and W. Mista, *Appl. Catal. B*, 2012, **117–118**, 135.
- [2] L. M. Misch, J. A. Kurzman, A. R. Derk, Y.-I. Kim, R. Seshadri, H. Metiu, E. W. McFarland and G. D. Stucky, *Chem. Mater.*, 2011, **23**, 5432.
- [3] P. Singh and M. S. Hegde, *Crystal Growth & Design*, 2010, **10**, 2995.
- [4] Y. Takahashi, H. Sakami, M. Nomura, *Anal. Chim. Acta*, 2002, **468**, 345.
- [5] Kim, S.-J.; Lemaux, S.; Demazeau, G.; Kim, J.-Y.; Choy, J.-H. *J. Mater. Chem.* **2002**, *12*, 995.
